# Supplementary material
Source: PubMed Central journal article supplement (PMC3044964)
Supplement: supp_M110.171256_jbc.M110.171256-1.pdf [file supp_M110.171256_jbc.M110.171256-1.pdf]

Table

Molecules identified by tandem mass spectrometry analysis. Protein scores and number of identified peptides are listed.

| Accession number  | protein description                                        | protein score | peptides identified |
|-------------------|------------------------------------------------------------|---------------|---------------------|
| IPI:IPI00027438.2 | Flotillin-                                                 | 2066          | 107                 |
| IPI:IPI00789008.1 | flotillin 2                                                | 1273          | 73                  |
| IPI:IPI00024067.4 | Isoform 1 of Clathrin heavy chain 1                        | 1243          | 105                 |
| IPI:IPI00748145.2 | Guanine nucleotide-binding protein G(i), alpha-2 subunit   | 986           | 82                  |
| IPI:IPI00217987.8 | <b>Integrin alpha-M precursor</b>                          | 1098          | 103                 |
| IPI:IPI00029769.6 | Isoform p59-HCK of Tyrosine-protein kinase HCK             | 151           | 36                  |
| IPI:IPI00789750.1 | 27 kDa protein                                             | 767           | 65                  |
| IPI:IPI00022542.1 | ROCK1 Rho-associated protein kinase 1                      | 551           | 65                  |
| IPI:IPI00220578.3 | Guanine nucleotide-binding protein G                       | 452           | 43                  |
| IPI:IPI00216308.5 | Voltage-dependent anion-selective channel prote            | 679           | 43                  |
| IPI:IPI00031804.1 | Isoform 1 of Voltage-dependent anion-selective channel p   | 568           | 30                  |
| IPI:IPI00420004.3 | myosin IG                                                  | 559           | 54                  |
| IPI:IPI00305383.1 | Cytochrome b-c1 complex subunit 2, mitochondrial precu     | 353           | 25                  |
| IPI:IPI00827847.2 | BPI Bactericidal permeability-increasing protein precursor | 594           | 65                  |
| IPI:IPI00009342.1 | Ras GTPase-activating-like protein IQGAP1                  | 499           | 40                  |
| IPI:IPI00418471.6 | Vimentin                                                   | 535           | 50                  |
| IPI:IPI00432416.4 | Isoform LYN B of Tyrosine-protein kinase Lyn               | 351           | 40                  |
| IPI:IPI00398700.3 | Isoform Alpha-2 of Guanine nucleotide-binding protein G(c  | 322           | 23                  |
| IPI:IPI00007244.1 | Isoform H17 of Myeloperoxidase precursor                   | 787           | 71                  |
| IPI:IPI00028031.2 | Isoform 1 of Very long-chain specific acyl-CoA dehydroge   | 136           | 22                  |
| IPI:IPI00024282.1 | Ras-related protein Rab-8B                                 | 333           | 24                  |
| IPI:IPI00298625.2 | Isoform LYN A of Tyrosine-protein kinase Lyn               | 423           | 49                  |
| IPI:IPI00872474.1 | LYN protein (Fragment)                                     | 423           | 51                  |
| IPI:IPI00847300.1 | Similar to Voltage-dependent anion-selective channel prot  | 445           | 26                  |
| IPI:IPI00020210.2 | Dysferlin_v1                                               | 429           | 48                  |
| IPI:IPI00218488.3 | Guanine nucleotide-binding protein G(t) subunit alpha-1    | 190           | 17                  |
| IPI:IPI00031131.4 | Adipocyte plasma membrane-associated protein               | 408           | 40                  |
| IPI:IPI00746851.1 | <b>Integrin beta chain, beta 2 variant (Fragment)</b>      | 516           | 40                  |
| IPI:IPI00290928.2 | Guanine nucleotide-binding protein alpha-13 subunit        | 397           | 33                  |
| IPI:IPI00604664.4 | NADH-ubiquinone oxidoreductase 75 kDa subunit, mitoch      | 361           | 22                  |
| IPI:IPI00221224.6 | Aminopeptidase N                                           | 556           | 52                  |
| IPI:IPI00027252.6 | Prohibitin-2                                               | 365           | 31                  |
| IPI:IPI00328744.6 | Guanine nucleotide-binding protein alpha-12 subunit        | 178           | 15                  |
| IPI:IPI00006395.1 | Guanine nucleotide-binding protein G(olf) subunit alpha    | 283           | 17                  |
| IPI:IPI00291467.7 | ADP/ATP translocase 3                                      | 209           | 34                  |
| IPI:IPI00026942.5 | ERLIN2 Isoform 1 of Erlin-2                                | 328           | 23                  |
| IPI:IPI00028481.1 | Ras-related protein Rab-8A                                 | 208           | 21                  |
| IPI:IPI00076042.2 | Short heat shock protein 60 Hsp60s2                        | 274           | 17                  |
| IPI:IPI00303476.1 | ATP synthase subunit beta, mitochondrial precursor         | 349           | 34                  |
| IPI:IPI00020436.4 | Ras-related protein Rab-11B                                | 438           | 31                  |
| IPI:IPI00008964.3 | Ras-related protein Rab-1B                                 | 326           | 26                  |
| IPI:IPI00007188.5 | ADP/ATP translocase 2                                      | 292           | 41                  |
| IPI:IPI00005719.1 | Isoform 1 of Ras-related protein Rab-1A                    | 306           | 28                  |
| IPI:IPI00023526.4 | Isoform 1 of Ras-related protein Rab-6A                    | 128           | 10                  |
| IPI:IPI00218628.3 | Isoform 2 of Integrin alpha-IIb precursor                  | 250           | 18                  |
| IPI:IPI00007940.6 | ERLIN1 ER lipid raft associated 1                          | 52            | 9                   |
| IPI:IPI00032808.1 | Ras-related protein Rab-3D                                 | 52            | 9                   |
| IPI:IPI00022881.1 | Isoform 1 of Clathrin heavy chain 2                        | 320           | 26                  |
| IPI:IPI00640276.1 | EF-hand domain-containing family member A1                 | 165           | 8                   |
| IPI:IPI00022134.1 | Putative small GTP-binding protein                         | 184           | 21                  |

## Table

Molecules identified by tandem mass spectrometry analysis. Protein scores and number of identified peptides are listed.

|                   |                                                             |     |    |
|-------------------|-------------------------------------------------------------|-----|----|
| IPI:IPI00025380.2 | Isoform 1 of Integrin alpha-L precursor                     | 295 | 25 |
| IPI:IPI00789691.1 | Flotillin 1                                                 | 354 | 26 |
| IPI:IPI00291928.8 | Ras-related protein Rab-14                                  | 157 | 12 |
| IPI:IPI00014758.1 | MMP25 Matrix metalloproteinase-25 precursor                 | 154 | 11 |
| IPI:IPI00027462.1 | Protein S100-A9                                             | 270 | 28 |
| IPI:IPI00335168.9 | Isoform Non-muscle of Myosin light polypeptide 6            | 392 | 38 |
| IPI:IPI00006957.3 | Isoform 1 of Dehydrogenase/reductase SDR family membe       | 238 | 21 |
| IPI:IPI00300096.4 | Ras-related protein Rab-35                                  | 263 | 19 |
| IPI:IPI00026268.3 | Guanine nucleotide-binding protein G(I)/G(S)/G(T) subunit   | 244 | 32 |
| IPI:IPI00397526.2 | Isoform 1 of Myosin-10                                      | 261 | 49 |
| IPI:IPI00026570.2 | Cytochrome c oxidase polypeptide VIIa-liver/heart,          | 329 | 11 |
| IPI:IPI00017334.1 | Prohibitin                                                  | 317 | 25 |
| IPI:IPI00789477.1 | LTF Similar to Lactotransferrin precursor                   | 258 | 24 |
| IPI:IPI00015148.3 | Ras-related protein Rap-1b precursor                        | 255 | 25 |
| IPI:IPI00016513.5 | Ras-related protein Rab-10                                  | 159 | 14 |
| IPI:IPI00026128.1 | Syntaxin-11                                                 | 121 | 7  |
| IPI:IPI00029260.2 | CD14 Monocyte differentiation antigen CD14 precursor        | 108 | 8  |
| IPI:IPI00013933.2 | Isoform DPI of Desmoplakin                                  | 239 | 58 |
| IPI:IPI00247063.3 | Neprilysin                                                  | 207 | 27 |
| IPI:IPI00383449.2 | Isoform 2 of Ras-related protein Rab-15                     | 233 | 24 |
| IPI:IPI00024145.1 | Voltage-dependent anion-selective channel protein 2         | 233 | 24 |
| IPI:IPI00298994.6 | Talin-1                                                     | 443 | 38 |
| IPI:IPI00003348.3 | Guanine nucleot                                             | 300 | 34 |
| IPI:IPI00028064.1 | Cathepsin G precursor                                       | 233 | 34 |
| IPI:IPI00023504.1 | Ras-related protein Rab-3A                                  | 45  | 6  |
| IPI:IPI00219835.1 | Isoform Gnas-2 of Guanine nucleotide-binding protein G(s    | 226 | 21 |
| IPI:IPI00061114.1 | Ras-related protein Rab-3C                                  | 192 | 26 |
| IPI:IPI00025252.1 | Protein disulfide-isomerase A3 precursor                    | 75  | 10 |
| IPI:IPI00216024.2 | Isoform 2 of Voltage-dependent anion-selective channel p    | 188 | 20 |
| IPI:IPI00219365.3 | Moesin                                                      | 203 | 22 |
| IPI:IPI00289819.4 | Cation-independent mannose-6-phosphate receptor precu       | 329 | 31 |
| IPI:IPI00480056.8 | RAB4A, member RAS oncogene family variant                   | 167 | 12 |
| IPI:IPI00001618.2 | Ras-related protein Rab-39A                                 | 167 | 12 |
| IPI:IPI00302030.2 | Ras-related protein Rab-30                                  | 167 | 12 |
| IPI:IPI00419932.5 | Putative Ras-related protein Rab-12                         | 167 | 13 |
| IPI:IPI00789157.1 | ATP5B Protein                                               | 203 | 20 |
| IPI:IPI00021475.1 | Ras-related protein Rab-33B                                 | 167 | 11 |
| IPI:IPI00006482.1 | Isoform Long of Sodium/potassium-transporting ATPase s      | 206 | 19 |
| IPI:IPI00031169.1 | Ras-related protein Rab-2A                                  | 254 | 13 |
| IPI:IPI00013475.1 | Tubulin beta-2A chain                                       | 177 | 12 |
| IPI:IPI00155168.2 | Protein tyrosine phosphatase, receptor type, C              | 356 | 48 |
| IPI:IPI00788932.1 | Guanine nucleotide binding protein                          | 178 | 12 |
| IPI:IPI00644474.4 | GNAS complex locus                                          | 178 | 10 |
| IPI:IPI00007676.3 | Estradiol 17-beta-dehydrogenase 12                          | 227 | 24 |
| IPI:IPI00787396.1 | similar to Guanine nucleotide-binding protein G(t), alpha-3 | 178 | 10 |
| IPI:IPI00007047.1 | Protein S100-A8                                             | 175 | 15 |
| IPI:IPI00218646.3 | Cytochrome b-245 heavy chain                                | 208 | 21 |
| IPI:IPI00290328.3 | Receptor-type tyrosine-protein phosphatase eta precursor    | 266 | 24 |
| IPI:IPI00016339.4 | Ras-related protein Rab-5C                                  | 168 | 14 |
| IPI:IPI00028108.1 | Regulator of G-protein signaling 19                         | 185 | 12 |
| IPI:IPI00012451.3 | Guanine nucleotide-binding protein subunit beta-4           | 224 | 21 |
| IPI:IPI00022608.1 | Sortilin-related receptor precursor                         | 165 | 18 |
| IPI:IPI00552280.2 | BPI Bactericidal/permeability-increasing protein            | 294 | 45 |

Table

Molecules identified by tandem mass spectrometry analysis. Protein scores and number of identified peptides are listed.

|                   |                                                                      |     |    |
|-------------------|----------------------------------------------------------------------|-----|----|
| IPI:IPI00297444.4 | <b>CD177 Isoform 1 of CD177 antigen precursor</b>                    | 164 | 12 |
| IPI:IPI00007752.1 | Tubulin beta-2C chain                                                | 163 | 12 |
| IPI:IPI00017342.1 | Rho-related GTP-binding protein Rh                                   | 109 | 11 |
| IPI:IPI00034159.1 | Vacuolar proton pump subunit d 1                                     | 152 | 8  |
| IPI:IPI00016342.1 | Ras-related protein Rab-7a                                           | 70  | 7  |
| IPI:IPI00017529.1 | CD58 Isoform 1 of Lymphocyte function-associated antigen 3 precursor | 162 | 18 |
| IPI:IPI00022143.3 | Isoform 1 of Extended-synaptotagmin-1                                | 76  | 8  |
| IPI:IPI00017184.2 | EH domain-containing protein 1                                       | 162 | 18 |
| IPI:IPI00010308.1 | C5a anaphylatoxin chemotactic receptor                               | 169 | 10 |
| IPI:IPI00019160.1 | Cytochrome P450 4F2                                                  | 150 | 16 |
| IPI:IPI00019345.1 | Ras-related protein Rap-1A precursor                                 | 282 | 29 |
| IPI:IPI00853533.1 | FCGR3A Protein                                                       | 130 | 18 |
| IPI:IPI00002370.2 | Cytochrome P450 4F3                                                  | 225 | 21 |
| IPI:IPI00027466.1 | Carbonic anhydrase 4 precursor                                       | 110 | 23 |
| IPI:IPI00419916.4 | Alkaline phosphatase, tissue-nonspecific isozyme precursor           | 104 | 4  |
